# Supplementary material
Source: PubMed Central journal article supplement (PMC1326171)
Supplement: pnas_0508883103_2.pdf [file pnas_0508883103_2.pdf]

MESC@TKKNCASRDQAASSVLDSE.VTPPLRS.SAVENRPPTGTAPWTE..RLSVAR..VQVNR..TGKQDNTDPIQPVVAEFQVVRDEQAA  
MEPAPSPPTPGGSR.RGLAGLGGSPRTASRKGLELGSVSSVLESEVGRSSLSGGGTFRMFPHHSITBSVNYDVA.TGSSLE.VKVMEL  
LHKRVPEGCASGGDKKTSIANIISGRVFTSY.LSPASSMK.VVLEDFNAGDVGKFEAGSLLCVNYDGASSGANKVMMKNSAVVLCNRKT  
T...APVDOLLTINDEG.GWACLCKEKLIKIALSPITKLGVCKFLQESSF...PH...ASADLALSYSPPSGE..A..STQVAVMVATRE  
RAVVVWEDYISQSRNAPVNLVSSDFEYTSVSDKTFNSNLRPPSLNELHMNSMTASAVPCDQVCVAFACS.SGKLVQFKCSPSGTERTVCESSM  
GSTRVWESLAGED..T.YH...EAEVDSG.GD.KVYS.....E...LT.AVQCSSEILSS...SGQLRLIPIESGKLEOHILPOCGG  
HPPPEGDSGOLPCKNGYDHSITWCPHHSITKSNRQGLVADHEKCEGVFSSDIIVSMLESOVAVGDDPLGKKDLACQKGIWPLDVQVDYKGI  
MSGICRKVSSIFGILS.ESSDLTLSSVLWDRSS.VYSLSSNISKWELDDSSERAA.YSD..INRALRGN.FDAILSESSENV..AIKEGVNIR  
TLLFATPK.DR.SSSSYMOYSLLTMOIKRGLDVGTTDKILEKKAPTEVLIIPKARVEADFLFSMRIRIGGKPSGSVIVISGDTATVSHYRNARLY  
YDLKQKQDGLVLAHAHSDNPCLIVYSLITIED.NGCOMSDAVTVEVTOYNPPFQSEDL.LL.CO.TVFN.F.SNOAYLYNE....SAVVCSSGTG  
QDPLVYDAGKLLSILPSADDFEE.AWVVLTEKASWVAPEKAVILGGVPPFRSISRKGSNSERSACEIRNL.FAGFAPRRASSEAWGTORORA  
KESLQEK.IYFNQGDVSLGAGLGGVLIIFSRNSLVSITSRENVSILADLECSLA...SSVAGPNSSEMIFETTKA....ETIAQE...DKIKL  
VLSGIARRTADE.ESEALLNGLN...EPLSCQVDSLEKLETSGSFERDCEINVFVMSKSHLIDLAKHWTFRGAEFLAMAVVSTQLEKQKHQK  
LKAFLQYCRKDLGHAQMVVDELLSSHSDLDSELDRAVTOISVD..LMDYPSAD.FQWABVPE.EPFGESN..SILHLQLEDK..MKAHSPLMD  
LHFLDLSKCHEELCSR.QRHLOLITLHEGKLSAMQURELQNLISONSITCVGSSNSLDFAGALWDMIQLVGDARRNTVLMDRNABVFSK  
LHVOVGFGRILGNFPVSGTFMTRLELCEBAEKLSAAIV...KHHHS..RLSDL..VNHALLDAN.....KREYEIIPSNLTPAD...VEERE  
VSDLEFFYCDAELEVYIRPEHPSCHQ.IQRTCELSNACVTIIRTCPDK.NENAVYPPFGLTPWYCCAVRKGISVASVLLQLLNEVSGLDKTKAK  
VSDVTICEVLEHEQVLRDAPMDSLEWAEVVINVNILKDMQAASHRQRNSLHRE.ESEK...EYVFP...A...EA.....NSGPGGIRT  
LNLYHBAWAEVLEAYSGAVTAKERE.EHKGLDEYWKRRDALPELHQOIKEFBATHKDSIGAAEQND..EAIMRITSRVLSIAKOHG.CYKVM  
WIEROH.EVILKWAYPOADSNLRNIT..EOLVALICELDGYVSCKSVDK.SSNRERYDNLEMVYLRKRSLLSPLLSLQGYVWAASLAEKYQEDIL  
WVYCDVNDSELRNIRRESLGFVGFSEYVVEKLEHNRQFSEILGEEFPEESIFIKEPNVLWHLFLHFQSSSETHALLTQSTOTTADEE  
VONCEQTDNQRVQRYVTFQA..LONFDFLRWYLRKGRKLSQIPISQHGQANLQAEHLVWHEINSQELERHATVLCDA...MERYFVKK  
EQAYMSKIK..LSDRKNLELYLSKAAPRAGRDAQVVKVRIEADLKIKLQBEVMRRRPPSVEDKQVEDOLHPEDLKLQLEGE.DGBLSL.WTBY  
KTLGLSKLAALASDFESMLOEKTEEMAE.....E..EFLHQETLPEQLAERQNLNSAMPVITAPOLIG...LYEENRRRANBYDFKKALD  
FAMTSSFRKTHRKLLEDCKWASSODMSKPHSCHMVEGNSDEETLQNLRNVLVQASSRCYGRPSESFEFGDQVLELROENMETSMLQDMS...VE  
LEYIDEEEDININDKLEILCRLQRENWSS.E....CKDP..EVSRDSIFVKILQKLLKDGIO....LSEYLEEVKDLQADOLCSEKSNPYF  
TLMQHKDFPACKMLMAVMLGSDHGDIGVEEGPSPME LjNUP133  
FVWKANYEYVQCEI.....HsNUP133
