# Supplementary material
Source: PubMed Central journal article supplement (PMC1326171)

**a**

25°C

34°C

38°C

|                                               |                                  |
|-----------------------------------------------|----------------------------------|
| $\Delta NUP133$<br>pPS808-<br><i>LjNup133</i> | WT<br>pPS808                     |
| $\Delta NUP133$<br>pPS808                     | WT<br>pPS808-<br><i>LjNup133</i> |

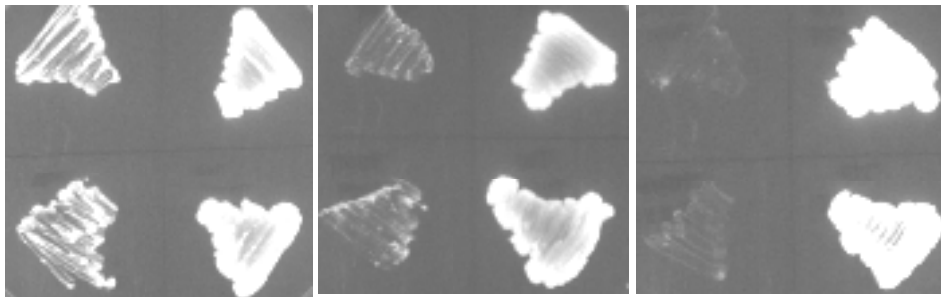**b** $\Delta NUP133$   
pPS808-GFP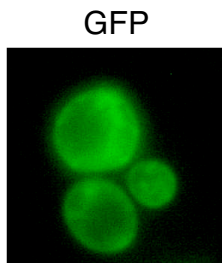 $\Delta NUP133$   
pPS808-GFP-*LjNUP133*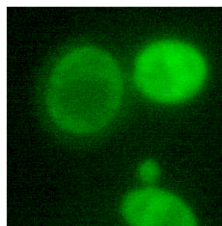

Supplement: pnas_0508883103_3.pdf [file pnas_0508883103_3.pdf]
