# Supplementary material
Source: PubMed Central journal article supplement (PMC1326171)

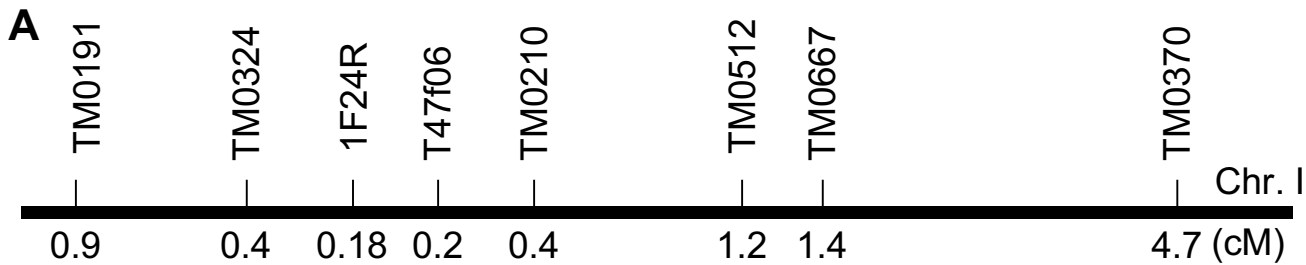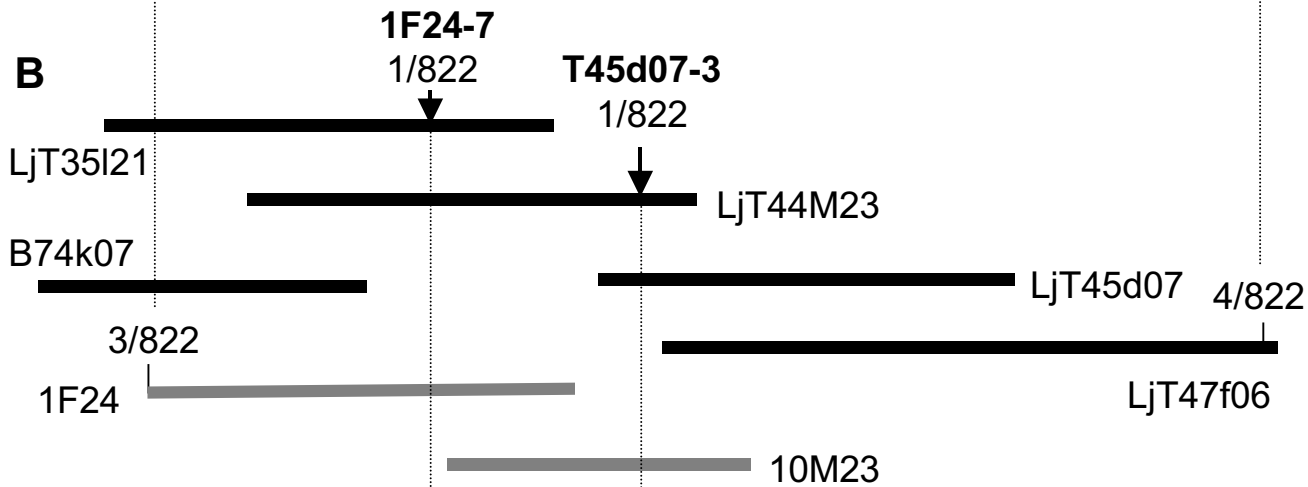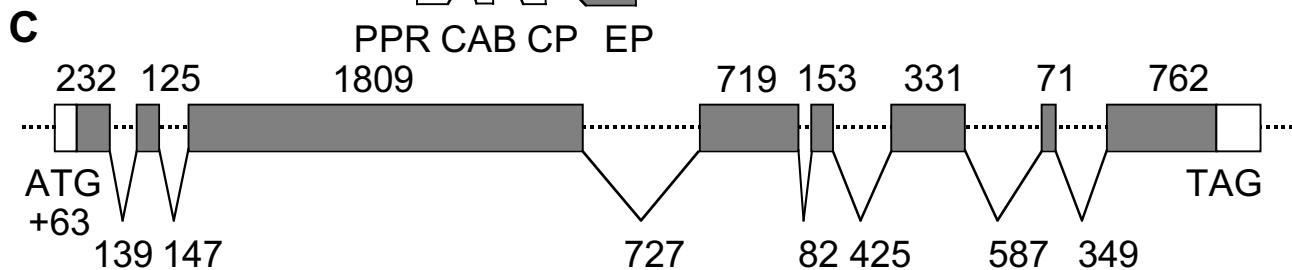

Supplement: pnas_0508883103_1.pdf [file pnas_0508883103_1.pdf]
